1 **Title:** Function and control of the fish secondary vascular system, a contrast to mammalian  
2 lymphatic systems

3

4 **Authors:** J. L. Rummer<sup>1,2\*</sup>, S. Wang<sup>1,3</sup>, J. F. Steffensen<sup>4</sup>, and D. J. Randall<sup>1,5</sup>

5

6 **Affiliations:**

7 <sup>1</sup>Department of Biology and Chemistry, City University of Hong Kong, 83 Tat Chee Avenue,  
8 Kowloon, Hong Kong, S.A.R. China.

9 <sup>2</sup>ARC Centre of Excellence for Coral Reef Studies, James Cook University, Townsville,  
10 Queensland, 4811, Australia.

11 <sup>3</sup>Fisheries College, Jimei University, 43 Yindou Road, Xiamen, 361021, China.

12 <sup>4</sup>Marine Biological Laboratory, University of Copenhagen, Strandpromenaden 5, Helsingor,  
13 DK-3000, Denmark.

14 <sup>5</sup>Department of Zoology, University of British Columbia, 6270 University Blvd.,  
15 Vancouver, British Columbia, V6T 1Z4 CANADA.

16

17 \*Correspondence to: [jodie.rummer@jcu.edu.au](mailto:jodie.rummer@jcu.edu.au)

18

19 **Summary:** Teleost fishes and mammalian lineages diverged 400 million years ago, and  
20 environmental requirements (water vs. air) have resulted in marked differences in  
21 cardiovascular function between fish and mammals. Suggestions that the fish secondary  
22 vascular system (SVS) could be used as a model for the mammalian lymphatic system should  
23 be taken with caution. Despite molecular markers indicating similar genetic origin, functions  
24 of the SVS in teleost fish are probably different from those of the mammalian lymphatic  
25 system. We determined that, in resting glass catfish, (*Kryptopterus bicirrhis*), plasma moves

26 from the primary vascular system (PVS) to the SVS through small connecting vessels less  
27 than 10  $\mu\text{m}$  in diameter, smaller than the red blood cells (RBCs). During and following  
28 hypoxia or exercise, flow increases, and RBCs enter the SVS, possibly via  $\beta$ -adrenoreceptor-  
29 mediated dilation of the connecting vessels. The volume of the SVS can be large and, as  
30 RBCs flow into the SVS, the haematocrit of the PVS falls by as much as 50% of the resting  
31 value. Possible functions of the SVS, including skin respiration, ionic and osmotic buffering,  
32 and reductions in heart work and RBC turnover, are discussed.

33

34 **Key index words:** lymphatic, secondary vascular system, stress

35

36 **Abbreviations:** ASR, aquatic surface respiration; DA, dorsal aorta;  $f_{\text{H}}$ , heart rate; ISO,  
37 isoproterenol; K, Fulton's condition factor; MS-222, tricaine methane sulfonate; PHT,  
38 Phentolamine; PROP, propranolol; PVS, primary vascular system;  $P_{\text{wO}_2}$ , water oxygen  
39 levels; RBC, red blood cell; SVS, secondary vascular system

40

41 **Introduction:**

42           The mammalian lymphatic system consists of blind-ending lymphatic vessels,  
43 lymph nodes, and other tissues, including the spleen, that collect, filter, and return fluid that  
44 drains from the tissues to the venous system and transport fats and proteins from the gut into  
45 the blood system (Alitalo et al., 2005; Wang and Oliver, 2010). In teleost fishes, some  
46 circulatory vessels contain clear fluid and have been described as lymphatic vessels  
47 (Kampmeier, 1969). Recently, Yaniv et al. (2006) and Isogai et al. (2009) also demonstrated  
48 that these vessels share some morphological and molecular characteristics with the  
49 lymphatic vessels found in other vertebrates, and suggested that these clear vessels in  
50 zebrafish could be used as a model for the mammalian lymphatic system. However, several  
51 decades ago these same vessels were hypothesized as part of a secondary vascular system  
52 (SVS), receiving inflow from the arterial system via arterio-arterial anastomoses and  
53 emptying into the venous circulation (Jensen et al., 2009; Steffensen et al., 1986; Steffensen  
54 and Lomholt, 1992; Vogel, 1981; Vogel, 1985; Vogel and Claviez, 1981). These vessels are  
55 not blind-ending and sometimes include red blood cells (RBCs) (Ishimatsu et al., 1992).  
56 Furthermore, there is no evidence that the SVS vessels are draining edematous tissues or  
57 playing a role in lipid transport. If not lymphatic, what then is the role of this secondary  
58 vascular system?

59           The volume of the SVS can range from 10-50% to nearly twice the volume of the  
60 primary circulation (Bushnell et al., 1998; Gallagher and Farrell, 1998; Skov and  
61 Steffensen, 2003; Steffensen and Lomholt, 1992) and therefore may serve to buffer osmotic  
62 and ionic changes in the primary circulation. Under resting conditions, no RBCs are present  
63 in the SVS. As many of the capillaries of the SVS are superficial, it may be that plasma  
64 supplies nutrients to the skin, and gas transfer occurs between water and superficial  
65 structures directly across the skin surface (Steffensen and Lomholt, 1992). During exercise

66 the addition of RBCs to the SVS could augment cutaneous O<sub>2</sub> uptake. However, during  
67 aquatic hypoxia, there could be cutaneous loss of O<sub>2</sub> across the skin. We hypothesize,  
68 therefore, that exercise will be associated with RBC flow into the SVS, and aquatic hypoxia  
69 will shut down RBC flow into the SVS.

70 Glass catfish (*Kryptopterus bicirrhis*) were used to investigate the control  
71 mechanisms and functions of the SVS. Glass catfish are transparent, making non-invasive,  
72 *in vivo* observations and experiments possible. Furthermore, substantial baseline  
73 observations have been made on the primary (PVS) and secondary (SVS) vascular systems  
74 in this species (Jensen et al., 2009; Steffensen and Lomholt, 1992; Steffensen et al., 1986).  
75 Our objectives were to: 1) map flow patterns in the SVS using injected fluorescent  
76 microspheres and video-microscopy, 2) map SVS flow patterns without injecting  
77 microspheres in un-anesthetized fish during rest, exercise, and aquatic hypoxia – with and  
78 without surface access, 3) use pharmacological methods to further understand how SVS  
79 flow is regulated and 4) measure any changes in PVS haematocrit associated with the SVS  
80 filling with RBCs.

81

## 82 **Materials and Methods**

### 83 *Experimental Animals*

84 A total of 135 glass catfish (mean  $\pm$ s.e.m. wet mass = 0.583  $\pm$ 0.019 g; standard  
85 length = 47.6  $\pm$ 0.5 mm) were transported to the Department of Biology and Chemistry at  
86 the City University of Hong Kong from a local supplier and maintained at 22 °C in  
87 dechlorinated municipal tap water under a natural photoperiod between the months of  
88 November 2010 and May 2011. Fish were fed daily to satiation with frozen bloodworms,  
89 but food was withheld for 24 h prior to experimentation. All animal care and experimental  
90 protocols comply with animal ethics regulations outlined by the Department of Biology and

91 Chemistry at the City University of Hong Kong.

92

93 *Blood collection*

94 The same protocol was used for collecting blood for all treatments. Fish were  
95 euthanized via head trauma, and the caudal fin was severed to bleed the caudal vein and  
96 artery into a heparinized microcapillary tube. This technique allowed the glass capillary  
97 tube to be placed in immediate contact with the caudal artery and vein, thus ensuring other  
98 fluids were not collected. Furthermore, fish capture and blood collections were done  
99 quickly (<20s) to minimize any effects that basic handling stress may have on the integrity  
100 of the RBCs. Samples (8-20  $\mu$ l depending on the size of the fish) were centrifuged at 5000  
101 rpm for 3 minutes and used to determine haematocrit.

102

103 *Series 1: Flow patterns*

104 It was first important to determine the size of RBCs during rest and whether size and  
105 shape would change if cells swelled during stress. This would permit us to select fluorescent  
106 microspheres to inject into the glass catfish PVS and SVS to track distribution and  
107 determine flow patterns. To determine RBC size, blood was collected from five fish and  
108 smeared onto glass slides with either a drop of Cortland's saline or one of two  
109 concentrations of a  $\beta$ -adrenergic agonist, Isoproterenol Hydrochloride (ISO; Sigma-Aldrich  
110 #15627), 0.001mM (prepared in Cortland's saline) (Caldwell et al., 2006). The RBCs were  
111 imaged using a fully motorized compound microscope (Olympus, model #BX61) with a  
112 Cool CCD still image camera (Olympus, model #DP-72) with capturing software (Image  
113 Pro Plus, v. 6.2). For each blood sample, 20 RBCs were randomly selected and measured  
114 using the tools integrated in the capturing software. Mean lengths for long and short axes  
115 and the ratio between the long and short axes were reported so that the appropriate size for

116 the fluorescent microspheres could be selected.

117 To determine blood flow patterns, fish were lightly anesthetized with tricaine  
118 methane sulfonate (MS-222) (1:25 diluted stock solution that was 4% w/v made using 1M  
119 Tris buffer at pH 9). Each fish was positioned on a moist sponge, left lateral side facing up  
120 and continuously moistened using a damp paper towel. Using an Olympus stereoscope  
121 (model #SZX12, Tokyo, Japan), the dorsal aorta (DA) of the fish was located, and a 10 $\mu$ L  
122 Hamilton™ syringe (model #80330) with 33G 0.8” PT2 needle (model #7803-05) was  
123 positioned approximately 5mm posterior to the periphery of the operculum. A 2 $\mu$ l volume  
124 of fluorescent microspheres was slowly (over approximately 10 s) injected into the PVS of  
125 the fish via the DA. Four different sized microspheres, 0.02  $\mu$ m (green), 1  $\mu$ m (blue), 4  $\mu$ m  
126 (green), and 10  $\mu$ m (red) (Invitrogen, #F8787, #F8815, #F8859, and #F8834 respectively)  
127 were used. Prior to injection, aliquots were sonicated for 5 min. and then centrifuged at  
128 3,000 x g for 3 min. to reduce agglomeration, as per manufacturer recommendations.

129 Immediately upon injection, fish were transferred to a plastic petri dish filled with  
130 approximately 20 ml water without anaesthetic, enough to completely cover the fish, which  
131 was not restrained but remained calm in the petri dish. We observed the fish using  
132 fluorescent light (X-cite Series 120Q EXFO using GFP/UV/RFP filters) and videos of the  
133 injection site were recorded to trace distribution of the microspheres (Video camera:  
134 Panasonic GPUS932HE; Software: Aver Mediacy v 1.7.3, H727 PCIe Hybrid DVBT  
135 HDMI) until no further changes could be observed.

136

### 137 *Series 2: Regulation of flow*

138 Fish were transferred from holding tanks using dip nets and held individually, one  
139 per 500ml glass beaker, in continuously aerated, clean water maintained at 22°C for 2 h  
140 before experiments commenced. During this time, all beakers were placed in white

141 polystyrene containers with lids so fish would stay light in colour; dark background results  
142 in melanophore dispersal mediated by cholinergic, muscarinic-type receptors (Fuji et al.,  
143 1982) making fish less transparent and harder to visualize. This was also done to ensure  
144 fish were in an unstressed state so valid resting conditions could be observed (see below).  
145 Additionally, because it was determined from earlier observations that anaesthetic promoted  
146 RBC distribution into the SVS fish were not anaesthetized for Series 2 experiments so that  
147 other regulatory mechanism could be revealed.

148

#### 149 *Resting*

150         These fish remain quiet when handled carefully and gently, but stressed glass catfish  
151 have RBCs in the SVS. If we transferred a fish to the petri plate for observation without  
152 RBCs entering the SVS, we referred to this fish as “resting”. Because of subsequent  
153 experimental design we also determined that multiple transfers, if done gently, did not  
154 promote RBC entry into the SVS. For resting measurements, un-anaesthetized individual  
155 fish (n=28) were placed in plastic petri plates containing 20 ml of well-aerated, clean water  
156 and examined under a dissecting microscope using white light, similarly to how fish were  
157 observed using fluorescent light, as described above. The caudal fin region of the fish was  
158 examined for the presence of RBCs in the SVS. Next, by gently tilting the petri plate to the  
159 side, the fish was positioned (ventral side up) against the sidewall of the petri plate.  
160 Because of the transparent nature of this species, the heart was also visible to the naked eye.  
161 Therefore, the image of the beating heart was projected live onto a computer monitor and  
162 heart rate ( $f_H$ ) was visually assessed and recorded as the number of beats per minute (using  
163 20s assessments). After each count, the caudal fin and posterior ventral regions of the fish  
164 were re-examined for presence or absence of RBCs in the SVS. This was replicated three  
165 times in order to achieve a mean  $f_H$  per fish and form a consensus as to the status of RBCs

166 in the SVS. Videos were recorded for each individual.

167 Blood was collected from another group of resting fish (n=10) and used to determine  
168 resting haematocrit. Fish were then gently pat dry, weighed (g), measured (standard length,  
169 mm), and length-to-weight ratio (Fulton's condition factor,  $K = (W \cdot 100) \cdot L^{-3}$ ) was  
170 calculated.

171

### 172 *Hypoxia exposure*

173 Hypoxic conditions were created in a 30-l white polystyrene container either  
174 allowing the fish to use aquatic surface respiration (ASR) or directly covering the surface  
175 with a clear Perspex sheet to prevent the fish from using ASR. Nitrogen was bubbled into  
176 the water, which reduced water oxygen levels ( $P_wO_2$ ) to 20 mmHg. Hypoxic conditions  
177 were continuously monitored using a pre-calibrated fiber optic  $O_2$  sensor (PreSens,  
178 Precision Sensing GmbH, Regensburg, Germany) (tip diameters 50-140  $\mu m$ ) amplified  
179 using an Oxy-micro oxygen meter and signal amplifier (PreSens, Precision Sensing GmbH,  
180 Regensburg, Germany). Data were collected throughout the duration of each experiment at  
181 a sampling rate of 1 Hz, and integrated with the manufacturer's software packages for PC  
182 Windows. All data were saved as text files and analyzed using Acqknowledge® Data  
183 Acquisition Software (Version 3.7.3, BIOPAC Systems, Inc.).

184 We used four groups of fish, each for  $f_H$  and RBC observation in hypoxia either  
185 permitted (group 1, n=7) or not permitted to access the surface (group 2, n=8), and for blood  
186 sampling immediately (group 3, n=10) or 1 h (group 4, n=10) following exposure to  
187 hypoxia with no access to surface. All fish were observed (as described above) prior to  
188 hypoxia experiments to ensure they were exhibiting resting conditions in terms of  $f_H$  and the  
189 absence of RBCs in SVS. Hypoxia exposure ( $P_wO_2 = 20.3 \pm 0.1$  mmHg) lasted for 5min.  
190 during which time they were either permitted surface access where they were observed



191 performing aquatic surface respiration (ASR) or not permitted surface access due to a clear  
192 Perspex lid on the surface of the water. For groups 1 and 2, following hypoxia exposure,  
193 fish were immediately (within 10s) observed and data collected for  $f_H$  and the status of  
194 RBCs in SVS. Fish were then allowed to recover for 1h (1h-recovery) in well-aerated,  
195 clean water and monitored again. We were not able to monitor all fish immediately and so  
196 the n values for the immediate and after 1h time points are different. Fish were permitted to  
197 recover overnight (12h), after which time survival was assessed and fish were returned to  
198 holding facilities and not used for further experimentation. For this and all subsequent  
199 experiments, fish that did not survive 12h following treatment were not included in  
200 analyses. Fish from group 3 exposed to hypoxia (no ASR), and after 5 min. removed from  
201 treatment. Blood was immediately collected from each fish to determine haematocrit, and  
202 fish were weighed and measured as described above. Fish from group 4 were exposed to  
203 hypoxia (no ASR) in the same manner, and after 5 min. removed from treatment, allowed  
204 1h-recovery in well-aerated, clean water. Then blood was sampled from each fish to  
205 determine haematocrit and fish were weighed and measured as described above.

206

### 207 *Exercise*

208 We used three groups of fish, each for  $f_H$  and RBC observation immediately and  
209 then 1h following exercise (group 1, n=10) and for blood sampling immediately (group 2,  
210 n=9) or 1 h (group 4, n=11) following exercise. First, all fish were observed (as described  
211 above) prior to exercise to ensure resting conditions. Exercise was simulated by chasing  
212 individual fish for 30s with a plastic probe in a beaker of well-aerated, clean water.  
213 Following this, fish were permitted recovery for 30s during which time they were  
214 transferred to either the microscope, blood sampling station, or well-aerated, clean water for  
215 1h recovery. Blood was sampled to determine haematocrit and fish were weighed and

216 measured as described above. The fish that were observed for  $f_H$  and RBCs in the SVS  
217 were then permitted to recover overnight (12 h), after which time survival was assessed and  
218 fish were returned to holding facilities and not used for further experimentation.

219

#### 220 *Pharmacological experiments*

221 All fish for the pharmacology experiments were observed (as described above) prior  
222 to treatments to ensure resting conditions. Then, each fish was exposed to one of the  
223 following treatments in well-aerated, clean water for 5 min. (n=7-12 for each group):  $\beta$ -  
224 agonist, Isoproterenol Hydrochloride (ISO; Sigma-Aldrich #15627) at a final concentration  
225 of 1 mM (Caldwell et al., 2006; Rummer and Brauner, 2011; Rummer et al., 2010),  $\beta$ -  
226 antagonist, Propranolol Hydrochloride (PROP; Sigma-Aldrich #P0884) at a final  
227 concentration of 2 mM (Caldwell et al., 2006; Rummer and Brauner, 2011; Rummer et al.,  
228 2010), or  $\alpha$ -antagonist, Phentolamine (PHT; Sigma-Aldrich #P7547) at a final concentration  
229 of 0.01 mM (Kagstrom and Holmgren, 1997; Namoto and Yamada, 1987). Immediately  
230 following 5 min., exposed fish were observed as described for resting conditions and  
231 transferred back to well-aerated, clean water. In the case of PROP, treatment fish were  
232 observed and subsequently exposed to the agonist (ISO) for 5 min., observed (PROP+ISO)  
233 and then transferred back to well-aerated, clean water. Following either single or double  
234 (sequential) exposure to drugs, fish were allowed 1 h-recovery in well-aerated, clean water.  
235 Following 1 h-recovery, measurements were taken for ISO and PROP+ISO treated fish and  
236 observations made as described above. Finally, fish were permitted to recover overnight  
237 (12 h), after which time survival was assessed and fish were returned to holding facilities  
238 and not used for further experimentation. All drugs were dissolved in well-aerated, clean  
239 water from the same source used for maintaining fish in the laboratory. All solutions were  
240 made fresh for each experiment.

241

242 *Statistical analyses*

243 Data are presented as mean  $\pm$  s.e.m. unless otherwise stated. All  $P_{wO_2}$  data were  
244 saved as text files and analyzed using Acqknowledge® Data Acquisition Software (Version  
245 3.7.3, BIOPAC Systems, Inc.). All data were compared statistically between treatments, and  
246 statistical differences were detected via paired t-test, ANOVA, or repeated measures  
247 ANOVA and, when necessary, a post-hoc Holm-Sidak multiple comparisons test. All  
248 statistical analyses were conducted using SigmaStat for Windows 3.5.0.54 (Systat Software,  
249 Inc., 2006), and all analyses were interpreted using  $\alpha < 0.05$  to determine statistical  
250 significance.

251

252 **Results**

253 *RBC size and dispersal*

254 Fluorescent microspheres were injected into the PVS. The 0.02, 1 and 4  $\mu$ m  
255 microspheres dispersed rapidly throughout both the PVS and SVS with a clear image for the  
256 0.02 and 4  $\mu$ m microspheres (Fig. 1). The 10 $\mu$ m fluorescent microspheres gave a strong  
257 signal but did not disperse from the dorsal aorta (DA), the original injection site. The RBCs  
258 obtained from a resting, unstressed glass catfish have a mean length of  $11.5 \pm 0.5$   $\mu$ m, width  
259 of  $7.1 \pm 0.12$   $\mu$ m, and a width to length ratio of  $63.0 \pm 0.1\%$  (means  $\pm$  s.e.m., n=6). When the  
260 RBCs increased in volume, the cells became more rounded and less flattened. When  
261 exposed to 1 $\mu$ M isoproterenol, RBC width to length ratio increased significantly from  
262 63.0% to  $69.3 \pm 0.7\%$  ( $p < 0.001$ , paired t-test). We measured several red (10 $\mu$ m) fluorescent  
263 beads and found them spherical with diameters between 10 and 1 $\mu$ m.

264

265 *Flow in the secondary vascular system*

266 From preliminary observations on un-anaesthetized fish we determined that under  
267 resting conditions only plasma flows slowly through the SVS. Flow in the tail section is  
268 always towards the head away from the tail and caudal heart. When a fish became stressed  
269 (by injection, removing scales, temperature change, excessive handling), RBCs rapidly  
270 entered the SVS. We categorized flow in the SVS into four stages (Fig. 2). Stage 0, resting,  
271 was when no RBCs could be observed anywhere in the SVS (i.e. only plasma). Stage 1 was  
272 when a few non-moving RBCs could be observed in the SVS. Stage 2 was when RBCs  
273 could be observed entering the SVS and flow, albeit slow, was noticeable. Stage 3 was if  
274 flow was rapid and RBCs were densely packed throughout the SVS.

275

#### 276 *Experimental exposure*

277 We observed a total of 5 mortalities throughout the entire project with no association  
278 with any particular treatment or time period.

279

#### 280 *Hypoxia and exercise*

281 Hypoxia and exercise both increased flow and number of RBCs in the SVS, and this  
282 resulted in a marked reduction in hematocrit in the PVS ( $p < 0.001$ , ANOVA; Fig. 3). Flow  
283 of RBCs into the SVS was more pronounced when fish were permitted to use aquatic  
284 surface respiration (ASR) throughout the duration of hypoxia exposure (Fig. 4).  
285 Immediately following hypoxia exposure with no ASR, RBCs in the SVS were sparse and  
286 flow was minimal or absent (Fig. 4). Without surface access, fish exposed to hypoxic water  
287 swam to the bottom of the experimental container, even resting on its side in some  
288 instances. This behaviour clearly contrasted that of the actively swimming hypoxia-  
289 exposed fish that were permitted surface access. After 1h recovery, there was greater influx  
290 of RBCs into the SVS in both hypoxic fish groups. However, flow of RBCs into the SVS

291 was more pronounced in exercised fish when compared to hypoxia-exposed fish (Fig. 4).  
292 Exercised fish also exhibited a significant increase in  $f_H$  that started to come back to resting  
293 by 1h but was still significantly elevated ( $p < 0.001$ , RM ANOVA, Fig. S1). However, there  
294 was no change in  $f_H$  in fish exposed to hypoxia regardless of surface access (ASR) ( $p$   
295  $= 0.115$ , RM ANOVA, Fig. S1). Neither hypoxia nor exercise was associated with any  
296 change in the length-to-weight ratio (Fulton's condition factor,  $K = (W \cdot 100) \cdot L^{-3}$ ,  
297 ANOVA; Fig. 3).

298

### 299 *Pharmacological experiments*

300 Exposure to the  $\beta$ -agonist, isoproterenol (ISO), dramatically increased RBC  
301 numbers and flow into the SVS. These changes were associated with an immediate increase  
302 in  $f_H$  but recovery by 1h ( $p < 0.001$ , RM ANOVA, Fig. S1). This response was less  
303 pronounced when compared to the significant increase in  $f_H$  with exercise, which persisted  
304 even after 1h recovery ( $p < 0.001$ , RM ANOVA, Fig. S1). The effects of ISO were  
305 ameliorated when exposure was combined with the  $\beta$ -antagonist, propranolol (PROP) (Fig.  
306 4), which also significantly decreased  $f_H$  ( $p < 0.001$ , RM ANOVA, Fig. S1). Recovery was  
307 evident by 1h. Upon exposure to the  $\alpha$ -antagonist (phentolamine; PHT), however, RBC  
308 flow into the SVS was minimal, and there was no effect on  $f_H$  (Fig. S1).

309

### 310 **Discussion**

311 There have been several reports of arterio-arterial anastomoses between the SVS and  
312 PVS in fish (reviewed by Steffensen and Lomholt, 1992) using vascular castes and *in vivo*  
313 microscopic observation. During resting conditions, only plasma flows through the SVS,  
314 presumably because inflow diameters are too small to allow RBC entry. Fluorescent  
315 microspheres, 0.02, 1, and 4  $\mu\text{m}$  were small enough to pass into the SVS within seconds

316 (Fig. 1), but 10  $\mu\text{m}$  microspheres were not, indicating that input vessels from the PVS to the  
317 SVS had a diameter of less than 10  $\mu\text{m}$ . Hypoxia, exercise and stress resulted in varying  
318 levels of RBC flow into the SVS. We hypothesized that RBC entry into the SVS would be  
319 shut down during aquatic hypoxia to prevent oxygen loss to the water across the skin. This  
320 was largely the case when fish were exposed to hypoxia but prevented from accessing the  
321 surface to perform ASR. However, fish actively swimming at the surface using ASR during  
322 hypoxia exposure exhibited some RBCs and flow into the SVS. Therefore we cannot fully  
323 accept our hypothesis that the SVS is not in use during hypoxia. We also did not measure  
324 pressure and do not know if the opening of the anastomoses during hypoxia and exercise in  
325 the glass catfish was due to increased PVS arterial pressure or relaxation of presumed  
326 sphincters around the anastomoses. Stresses such as hypoxia and exercise have been  
327 reported to increase circulating catecholamines in fish (Caldwell et al., 2006; Primmitt et  
328 al., 1986; Thomas and Perry, 1992), and this, combined with our results outlining the effects  
329 of adrenergic manipulations indicate that catecholamines are involved in the increased RBC  
330 entry into the SVS following hypoxia and exercise. Nitric oxide is also reported to mediate  
331 SVS dilation under hypoxia (Jensen et al., 2009) but was not investigated here.

332         Increased RBC flow into the SVS markedly decreased PVS hematocrit following  
333 both hypoxia and exercise in glass catfish. We realize the difficulty of blood collection  
334 without admixture in such small fish. However, the procedure used was the same for all  
335 fish and we see consistent differences between groups. It is unlikely that admixture  
336 occurred in only one group or to a different extent between groups, but this remains a  
337 possibility. The fish itself did not change volume, as indicated by no change to body  
338 condition factor, a proxy used to indicate changes in body volume. Therefore, water influx  
339 is unlikely to play a substantial role in the observed hematocrit change. PVS  
340 haemoconcentration due to blood volume reduction (Pearson and Stevens, 1991;

341 Yamamoto, 1988), RBC swelling (Caldwell et al., 2006), and splenic release (Gallaugh et  
342 al., 1995) occurred in fish during exercise and hypoxia and may have offset the large  
343 decrease in PVS haematocrit, i.e. our measurements may underestimate the effect of  
344 increased RBC flow into the SVS on the haematocrit of the PVS. However, the magnitude  
345 of the hematocrit reduction we observed indicates that the volume of the SVS is at least  
346 equal to, if not larger than that of the PVS in glass catfish. We know of no other report of a  
347 reduction in Hct during hypoxia or exercise in fish. Although, Steinhausen et al., (2008)  
348 reported that sockeye salmon exhibited no significant change in Hct with exercise. In fact  
349 hypoxia and exercise have been reported to increase Hct in fish (Gallaugh and Farrell,  
350 1998; Wells, 2009). These differences in the magnitude of the changes in Hct with exercise  
351 and hypoxia may be related to the volume of the SVS. It has been reported that the  
352 secondary vascular system can range from 10-50% to nearly twice the volume of the  
353 primary circulation (Bushnell et al., 1998; Gallaugh and Farrell, 1998; Skov and  
354 Steffensen, 2003; Steffensen and Lomholt, 1992). The magnitude of other effects, such as  
355 splenic release of RBCs, increases in RBC volume and blood volume reduction (see above)  
356 may also play a role in differences in the magnitude of the Hct change with increased RBCs  
357 flow into the SVS of different fish species.

358         Various hypotheses as to the function of the SVS have been proposed. We suggest  
359 that retaining RBCs in a small PVS volume in resting fish will reduce work of the heart and  
360 RBC production. Recently, Rasmussen and colleagues investigated the role of the SVS in  
361 rainbow trout and concluded that, because the SVS can regulate concentration and  
362 distribution of cell types, e.g. immune cells, the SVS likely plays an important role in  
363 immune function (Rasmussen et al., in press). Ishimatsu and colleagues suggested the SVS  
364 plays a role in acid-base regulation and epithelial ion transport probably via  $\text{Cl}^-/\text{HCO}_3^-$   
365 exchangers, which may also be superficially located (Ishimatsu et al., 1992). There are

366 large fluid shifts with as much as 20% of PVS plasma volume moving into the tissues  
367 during exercise or exposure to hypoxia (Pearson and Stevens, 1991; Yamamoto et al., 1983;  
368 Yamamoto, 1988). Thus, increased SVS flow and, therefore, more rapid mixing of the SVS  
369 and PVS could buffer ionic or osmotic changes in the PVS during exercise or other forms of  
370 stress. When only plasma flows through the SVS, the probable function is to deliver  
371 nutrients and remove waste (Steffensen and Lomholt, 1992), with gas transfer occurring  
372 directly across the skin. Flushing the SVS with RBCs following exercise would enhance O<sub>2</sub>  
373 uptake across the skin. The SVS was less flushed with RBCs during aquatic hypoxia (no  
374 ASR) than it was when fish were in normoxic water during recovery from hypoxia or both  
375 immediately following and upon 1h recovery from exercise. However, these changes were  
376 small and not reflected in differences in the reduction in PVS haematocrit between hypoxic  
377 and exercise exposed groups.

378         The SVS is restricted to and variable amongst the Actinopterygii and related to  
379 function rather than phylogenetic position (Skov and Bennett, 2004). A more extensive SVS  
380 may be linked to increased scope for activity, which in turn may be associated with  
381 enhanced skin O<sub>2</sub> uptake via the SVS during exercise. There is no evidence of an SVS in  
382 lungfish (Vogel and Mattheus, 1998), but whether our Silurian vertebrate ancestors had a  
383 SVS subsequently lost in the Acanthodii or the SVS evolved in the Actinopterygii is  
384 unknown. What is clear is that the organization of circulation and requirements for fluid  
385 balance are different in aquatic and terrestrial vertebrates. It follows that the changes in the  
386 vertebrate circulation between extant fish and mammals are to be expected. Tissue edema  
387 and fluid drainage can be problematic in terrestrial mammals, as they have high blood  
388 pressure and are subject to the effects of gravity that come with living in an aerial  
389 environment. While there is a paucity of information on the mechanisms underlying tissue  
390 fluid balance in fish, fish blood pressures are lower than those of mammals, and living in



391 water eliminates the effects of gravity because the density of the environment is similar to  
392 that of their own body. Furthermore, there is no evidence that the SVS plays a role in  
393 countering tissue edema and aiding fluid drainage. The SVS is not associated with the  
394 celiac, mesenteric or renal arteries, and no association has been made between increased  
395 SVS flow and food intake (Skov and Steffensen, unpublished observations reported in Skov  
396 and Bennett (2004)). The SVS, unlike the lymphatic system of mammals (Kayama and  
397 Iijima, 1976; Robinson and Mead, 1973), is not involved in uptake from the gut. Therefore,  
398 it is clear that the SVS is not functioning in the same way as the mammalian lymphatic  
399 system. Additionally, the SVS vessels are not blind-ending, and flow originates directly  
400 from the primary vascular system. Following hypoxia and exercise, RBCs enter the SVS  
401 and flow increases. Thus, the presence of molecular markers for the mammalian lymphatic  
402 system in the SVS vessels cannot be used as indicators of lymphatic function in fish. In  
403 summary, and in contrast to the conclusions of Yaniv et al. (2006), the SVS and the PVS are  
404 not distinct vascular systems, and there are circumstances during which the SVS does  
405 contain RBCs. We conclude, and agree with recent arguments by Vogel (2010), that the  
406 SVS has different form and function from, and is not a suitable model for, the mammalian  
407 lymphatic system.

408

409 **Acknowledgments:** The authors wish to thank Alice Chan Ka Yee, Alex Lin, and the animal  
410 care staff employed by the City University of Hong Kong for technical assistance throughout  
411 this project as well as two anonymous reviewers for their constructive and helpful comments  
412 on this manuscript. This project was funded by the Department of Biology and Chemistry,  
413 City University of Hong Kong, project #9380049 to D.J.R., and J.L.R. was funded by the  
414 Australian Research Council Centre of Excellence for Coral Reef Studies for the writing  
415 portion of this project.  
416

417 **References**

418 **Alitalo, K., Tammela, T. and Petrova, T. V.** (2005). Lymphangiogenesis in  
419 development and human disease. *Nature* **438**, 946-953.

420 **Bushnell, P. G., Conklin, D. J., Duff, D. W. and Olson, K. R.** (1998). Tissue and  
421 whole-body extracellular, red blood cell and albumin spaces in the rainbow trout as a  
422 function of time: a reappraisal of the volume of the secondary circulation. *J. Exp. Biol.* **201**,  
423 1381-1391.

424 **Caldwell, S., Rummer, J. L. and Brauner, C. J.** (2006). Blood sampling techniques  
425 and storage duration: Effects on the presence and magnitude of the red blood cell [beta]-  
426 adrenergic response in rainbow trout (*Oncorhynchus mykiss*). *Comp. Biochem. Phys. A* **144**,  
427 188-195.

428 **Fujii, R., Miyashita, Y. and Fujii, Y.** (1982). Muscarinic cholinceptors mediate  
429 neurally evoked pigment aggregation in glass catfish melanophores. *J. Neur. Transm.* **54**, 29-  
430 39.

431 **Gallaughier, P. and Farrell, A. P.** (1998). Hematocrit and blood oxygen-carrying  
432 capacity. In *Fish Respiration*, vol. 17 (eds. S. F. Perry and B. Tufts), pp. 185-227. San Diego:  
433 Academic Press.

434 **Gallaughier, P., Thorarensen, H. and Farrell, A. P.** (1995). Hematocrit in oxygen  
435 transport and swimming in rainbow trout (*Oncorhynchus mykiss*). *Respir. Physiol.* **102**, 279-  
436 292.

437 **Gardiner, B. G., Janvier, P., Patterson, C., Forey, P. L., Greenwood, P. H., Miles,**  
438 **R. S. and Jeffries, R. P. S.** (1979). The salmon, the lungfish and the cow: a reply. *Nature*  
439 **277**, 175-176.

440 **Ishimatsu, A., Iwama, G. K., Bentley, T. B. and Heisler, N.** (1992). Contribution of  
441 the secondary circulatory system to acid-base regulation during hypercapnia in rainbow trout  
442 (*Oncorhynchus mykiss*). *J. Exp. Biol.* **170**, 43-56.

443 **Isogai, S., Hitomi, J., Yaniv, K. and Weinstein, B.** (2009). Zebrafish as a new  
444 animal model to study lymphangiogenesis. *Anat. Sci. Int.* **84**, 102-111.

445 **Jensen, L. D. E., Cao, R., Hedlund, E.-M., Soll, I., Lundberg, J. O., Hauptmann,  
446 G., Steffensen, J. F. and Cao, Y.** (2009). Nitric oxide permits hypoxia-induced lymphatic  
447 perfusion by controlling arterial-lymphatic conduits in zebrafish and glass catfish. *Proc. Nat.  
448 Acad. Sci. USA* **106**, 18408-18413.

449 **Kagstrom, J. and Holmgren, S.** (1997). VIP-induced relaxation of small arteries of  
450 the rainbow trout, *Oncorhynchus mykiss*, involves prostaglandin synthesis but not nitric  
451 oxide. *J. Auton. Nerv. Syst.* **63**, 68-76.

452 **Kampmeier, O. F.** (1969). Evolution and comparative morphology of the lymphatic  
453 system. Springfield, Ill.: Thomas.

454 **Kayama, M. and Iijima, N.** (1976). Studies on lipid transport mechanism in the  
455 fish. *The Japanese Society of Fisheries Science* **42**, 987-996.

456 **Namoto, S. and Yamada, K.** (1987). Effects of forskolin, isoproterenol and lithium  
457 ions on leucophores of a teleost, *Oryzias latipes*: Evidence for involvement of adenylate  
458 cyclase in pigment-dispersion response. *Comp. Biochem. Phys. C* **86**, 91-95.

459 **Pearson, M. P. and Stevens, E. D.** (1991). Size and hematological impact of the  
460 splenic erythrocyte reservoir in rainbow trout, *Oncorhynchus mykiss*. *Fish Physiol. Biochem.*  
461 **9**, 39-50.

462 **Perry, S. F., Jonz, M. G. and Gilmour, K. M.** (2009). Oxygen sensing and the  
463 hypoxic ventilatory response. In *Fish Physiology*, vol. Volume 27 (eds. A. P. F. Jeffrey G.  
464 Richards and J. B. Colin), pp. 193-253: Academic Press.

465 **Primmett, D., Randall, D., Mazeaud, M. and Boutilier, R.** (1986). The role of  
466 catecholamines in erythrocyte pH regulation and oxygen transport in rainbow trout (*Salmo*  
467 *gairdneri*) during exercise. *J. Exp. Biol.* **122**, 139-148.

468 **Rasmussen, K. J., Steffensen, J. F. and Buchmann, K.** (in press). Differential  
469 occurrence of immune cells in the primary and secondary vascular system in rainbow trout  
470 *Oncorhynchus mykiss* (Walbaum). *Journal of Fish Disease* in press.

471 **Robinson, J. S. and Mead, J. F.** (1973). Lipid Absorption and Deposition in  
472 Rainbow Trout (*Salmo gairdnerii*). *Canadian Journal of Biochemistry* **51**, 1050-1058.

473 **Rummer, J. L. and Brauner, C. J.** (2011). Plasma-accessible carbonic anhydrase at  
474 the tissue of a teleost fish may greatly enhance oxygen delivery: *in vitro* evidence in rainbow  
475 trout, *Oncorhynchus mykiss*. *J. Exp. Biol.* **214**, 2319-2328.

476 **Rummer, J. L., Roshan-Moniri, M., Balfry, S. K. and Brauner, C. J.** (2010). Use  
477 it or lose it? Sablefish, *Anoplopoma fimbria*, a species representing a fifth teleostean group  
478 where the  $\beta$ NHE associated with the red blood cell adrenergic stress response has been  
479 secondarily lost. *J. Exp. Biol.* **213**, 1503-1512.

480 **Skov, P. V. and Bennett, M. B.** (2004). The secondary vascular system of  
481 Actinopterygii: interspecific variation in origins and investment. *Zoomorphology* **123**, 55-64.

482 **Skov, P. V. and Steffensen, J. F.** (2003). The blood volumes of the primary and  
483 secondary circulatory system in the Atlantic cod *Gadus morhua* L., using plasma bound  
484 Evans Blue and compartmental analysis. *J. Exp. Biol.* **206**, 591-599.

485           **Steffensen, J. F. and Lomholt, J. P.** (1992). 4 The Secondary vascular system. In  
486 *Fish Physiology*, vol. Volume 12, Part A (eds. D. J. R. W.S. Hoar and A. P. Farrell), pp. 185-  
487 217: Academic Press.

488           **Steffensen, J. F., Lomholt, J. P. and Vogel, W. O. P.** (1986). *In vivo* observations  
489 on a specialized microvasculature, the primary and secondary vessels in fishes. *Acta Zool.* **67**,  
490 193-200.

491           **Steinhausen, M. F., Sandblom, E., Eliason, E. J., Verhille, C. and Farrell, A. P.**  
492 (2008). The effect of acute temperature increases on the cardiorespiratory performance of  
493 resting and swimming sockeye salmon (*Oncorhynchus nerka*). *J. Exp. Biol.* **211**, 3915-3926.

494           **Thomas, S. and Perry, S. F.** (1992). Control and consequences of adrenergic  
495 activation of red blood cell Na<sup>+</sup>/H<sup>+</sup> exchange on blood oxygen and carbon dioxide transport  
496 in fish. *J. Exp. Zool.* **263**, 160-175.

497           **Vogel, W. O.** (2010). Zebrafish and lymphangiogenesis: a reply. *Anat. Sci. Int.* **85**,  
498 118-119.

499           **Vogel, W. O. P.** (1981). Structure and principles of organization of the vascular  
500 system in bony fishes. *Gegenbaurs morphologisches Jahrbuch* **127**, 772-784.

501           **Vogel, W. O. P.** (1985). The caudal heart of fish: not a lymph heart. *Acta Anat.* **121**,  
502 41-45.

503           **Vogel, W. O. P. and Claviez, M.** (1981). Vascular specialization in fish, but no  
504 evidence for lymphatics. *Z. Naturforsch* **36C**, 490-492.

505           **Vogel, W. O. P. and Mattheus, U.** (1998). Lymphatic vessels in lungfishes (Dipnoi).  
506 *Zoomorphology* **117**, 199-212.

507 **Wang, Y. and Oliver, G.** (2010). Current views on the function of the lymphatic  
508 vasculature in health and disease. *Gene Dev.* **24**, 2115-2126.

509 **Wells, R. M. G.** (2009). Blood-gas transport and hemoglobin function: adaptations  
510 for functional and environmental hypoxia. In *Fish Physiology*, vol. 27 (eds. A. P. Farrell, J.  
511 G. Richards, and C. J. Brauner), pp. 255-299: Academic Press.

512 **Wells, R. M. G. and Baldwin, J.** (2006). Plasma lactate and glucose flushes  
513 following burst swimming in silver trevally (*Pseudocaranx dentex*: Carangidae) support the  
514 “releaser” hypothesis. *Comp. Biochem. Phys. A* 143, 347-352.

515 **Yamamoto, K., Itazawa, Y. and Kobayashi, H.** (1983). Erythrocyte supply from  
516 the spleen and hemoconcentration in hypoxic yellowtail. *Mar. Biol.* **73**, 221-226.

517 **Yamamoto, K.-I.** (1988). Contraction of spleen in exercised freshwater teleost. *Comp.*  
518 *Biochem. Phys. A* 89, 65-66.

519 **Yaniv, K., Isogai, S., Castranova, D., Dye, L., Hitomi, J. and Weinstein, B.**  
520 (2006). Live imaging of lymphatic development in the zebrafish. *Nat. Med.* **12**, 711–716.

521

522 **Figure Captions:**

523 **Fig. 1.** Fluorescent microspheres dispersing through the caudal region of the glass catfish  
524 secondary vascular system (SVS). Microspheres that were 0.02 $\mu\text{m}$  (green, panel A) and 4 $\mu\text{m}$   
525 (green, panel B) were small enough to pass into the SVS. A white box on panel A is enlarged  
526 to represent the body segment illustrated in panel B. CH, caudal heart.

527

528 **Fig 2.** Light microscope images of the ventral-most vessel of the glass catfish secondary  
529 vascular system (SVS). In all images, the top of the panel represents the dorsal side of the  
530 fish, bottom is ventral, right is posterior, and left is anterior. An arrow in each panel indicates  
531 the ventral most-vessel of the SVS and typical direction of flow. Each stage (0-3) of red  
532 blood cell (RBC) dispersal into the SVS is depicted in separate panels. Stage 0: There are no  
533 RBCs in the SVS, Stage 1: Few RBCs in the SVS, little or no flow, Stage 2: RBCs starting to  
534 enter the SVS, individual cells can still be identified, flow is noticeable but slow, Stage 3:  
535 Rapid flow of densely packed RBCs through the SVS.

536

537 **Fig. 3.** Changes in haematocrit and condition factor in glass catfish upon and following  
538 exposure to hypoxia (no ASR) and exercise. Data are plotted as means and standard errors.  
539 Haematocrit was measured at rest, immediately following treatment, and following 1h  
540 recovery. A different group of fish was used for each treatment, i.e. not repeated measures.  
541 The number of replicates (n) are noted for each sampling time, and different letters demarcate  
542 significant differences within treatment (ANOVA). Inset shows no change in the fish  
543 condition factor ( $K = (W \cdot 100) \cdot L^{-3}$ ) at each sampling.

544

545 **Fig. 4.** Changes in secondary vascular system (SVS) flow patterns by stage (0-3). See Fig. 2



546 for stage descriptions. The stage of the SVS was observed immediately (*Imm.*) or 1h  
547 following exposure (*1h*). The y-axis represents the percentage of fish observed exhibiting  
548 each stage of the SVS within a treatment group (x-axis). The number of replicates (n) are  
549 noted on the top of each bar for each treatment. Red blood cells, RBCs; aquatic surface  
550 respiration, ASR; propranolol, PROP; isoproterenol, ISO; phentolamine, PHT.

551

## 552 **Supplemental Materials**

553 **Fig. S1.** Changes in heart rate ( $f_H$ ) in glass catfish upon and following exposure to hypoxia  
554 with surface access (ASR) and without surface access (no ASR) immediately and following  
555 1h recovery (panel A), immediately following and 1h into recovery from exercise (panel B),  
556 and upon treatment with isoproterenol (ISO), propranolol (PROP), both sequentially  
557 (ISO+PROP), or phentolamine (PHT) immediately or following 1h recovery (panel C).  
558 Data are plotted as means and standard errors. A different group of fish was used for each  
559 type of treatment. Different letters demarcate significant differences within each panel, and  
560 p-values are noted at the upper, right corner of each panel (ANOVA). See Materials and  
561 Methods for further details.

**A**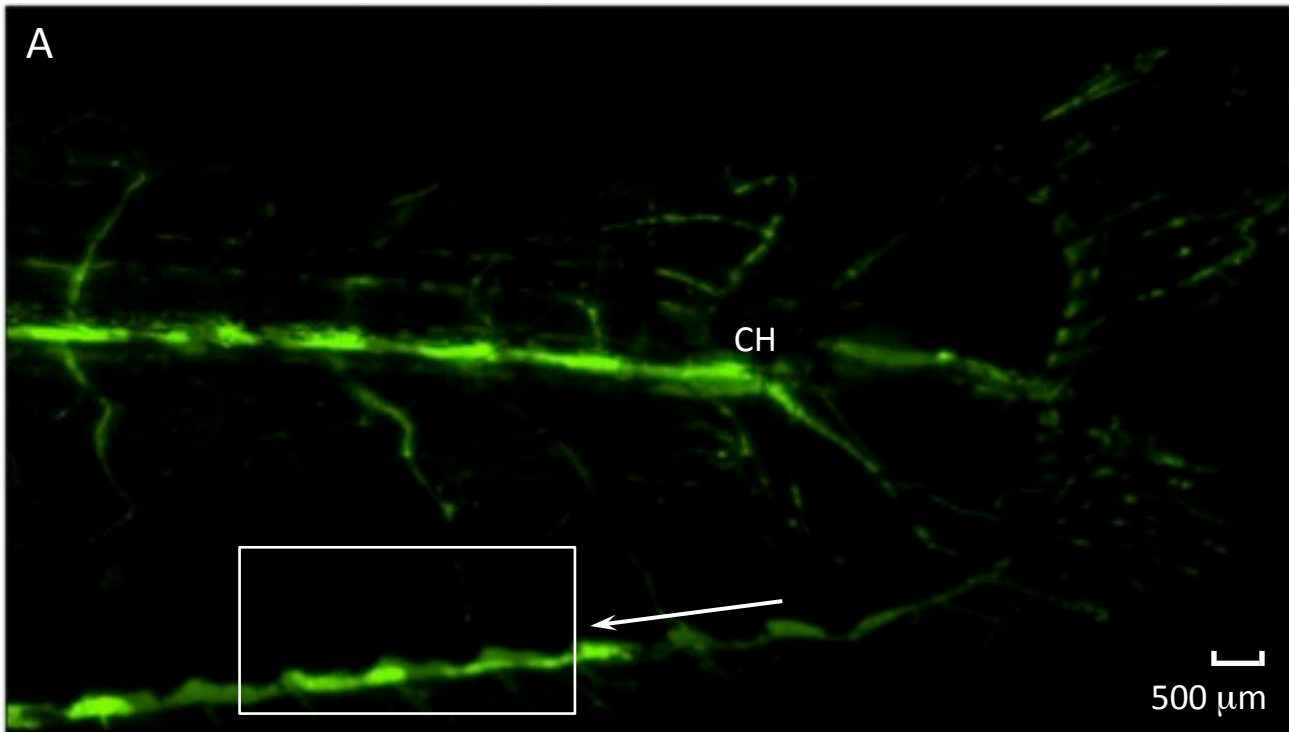**B**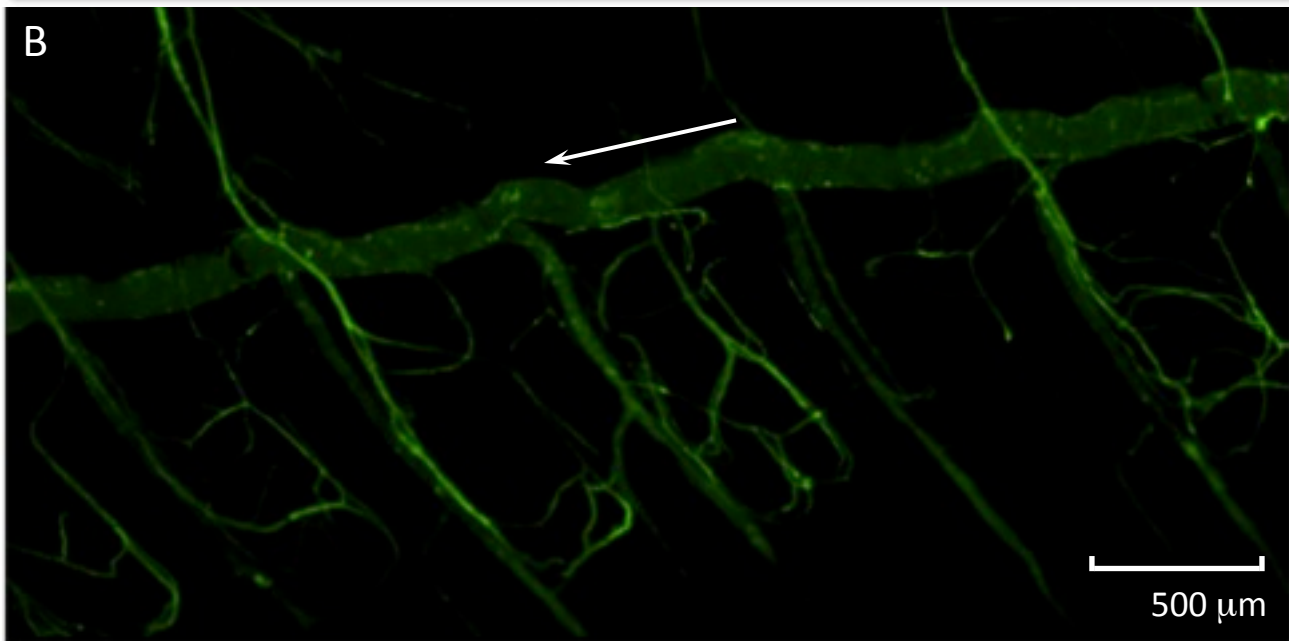

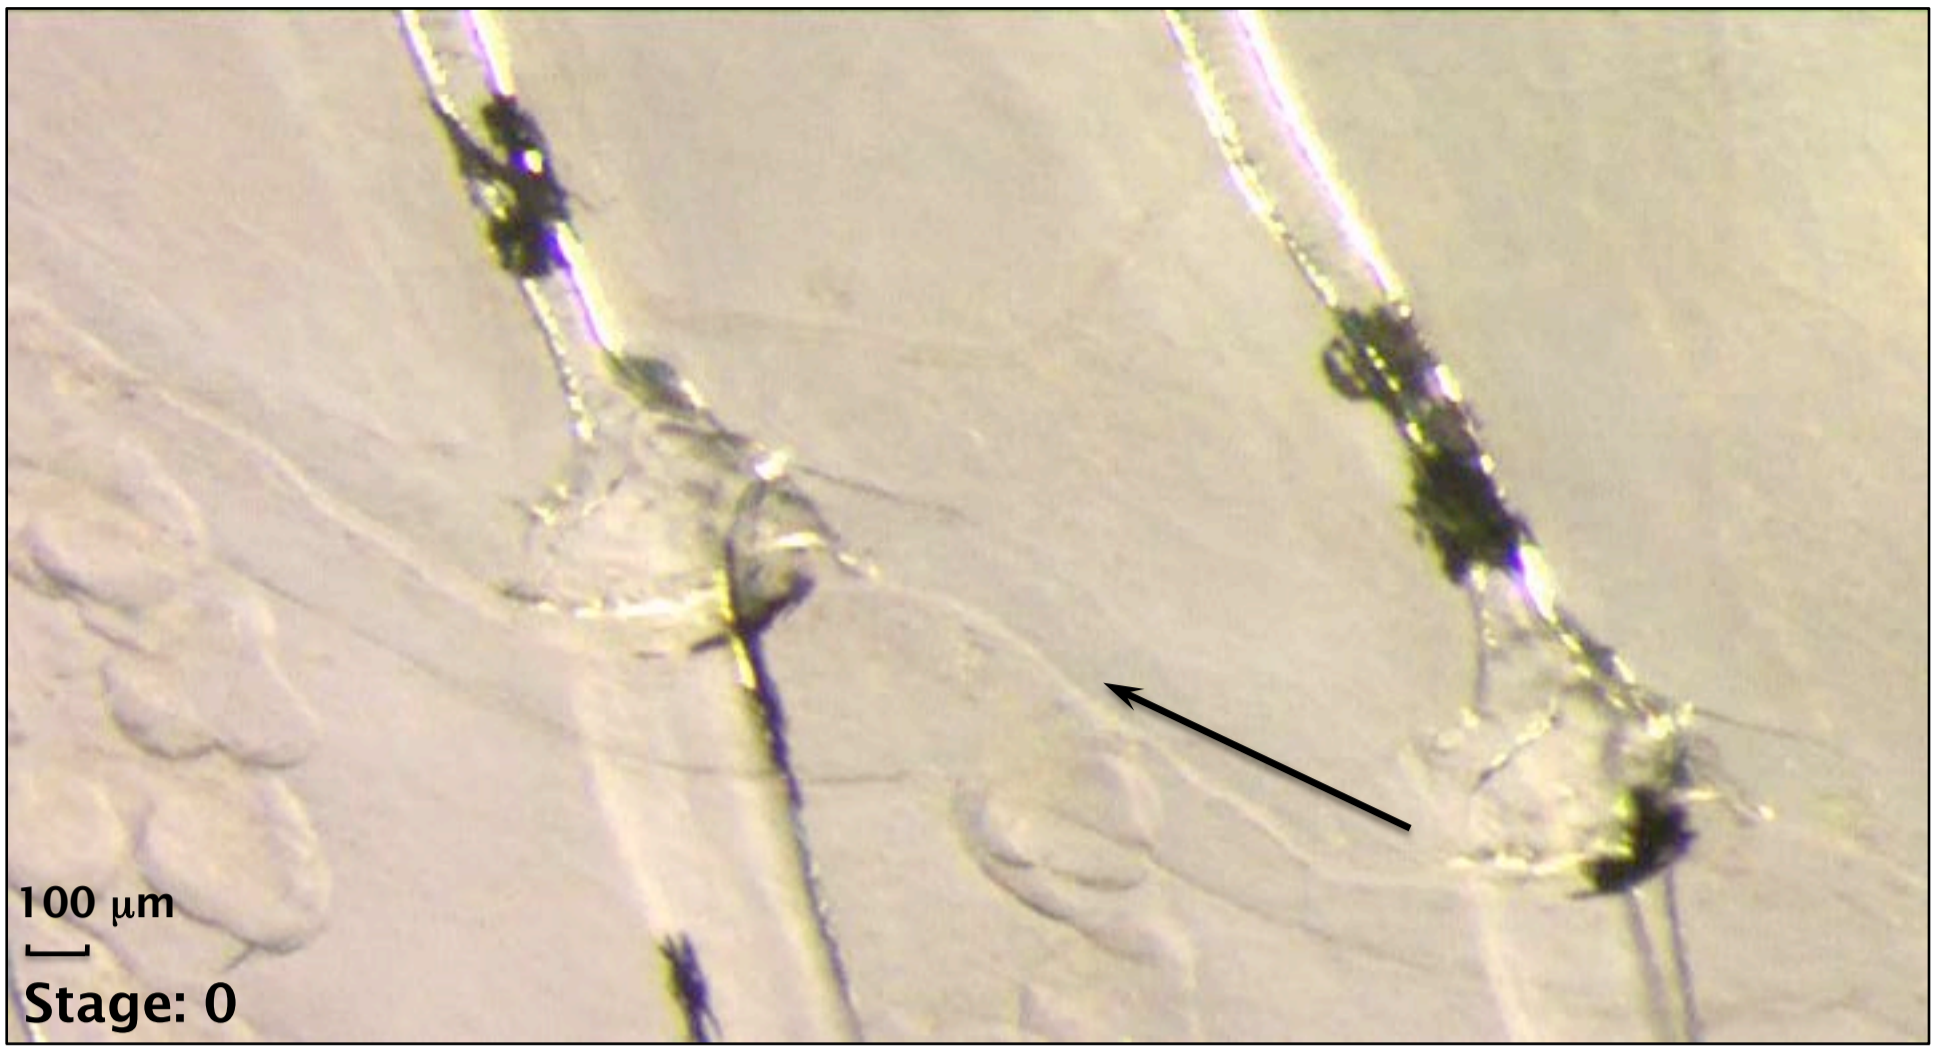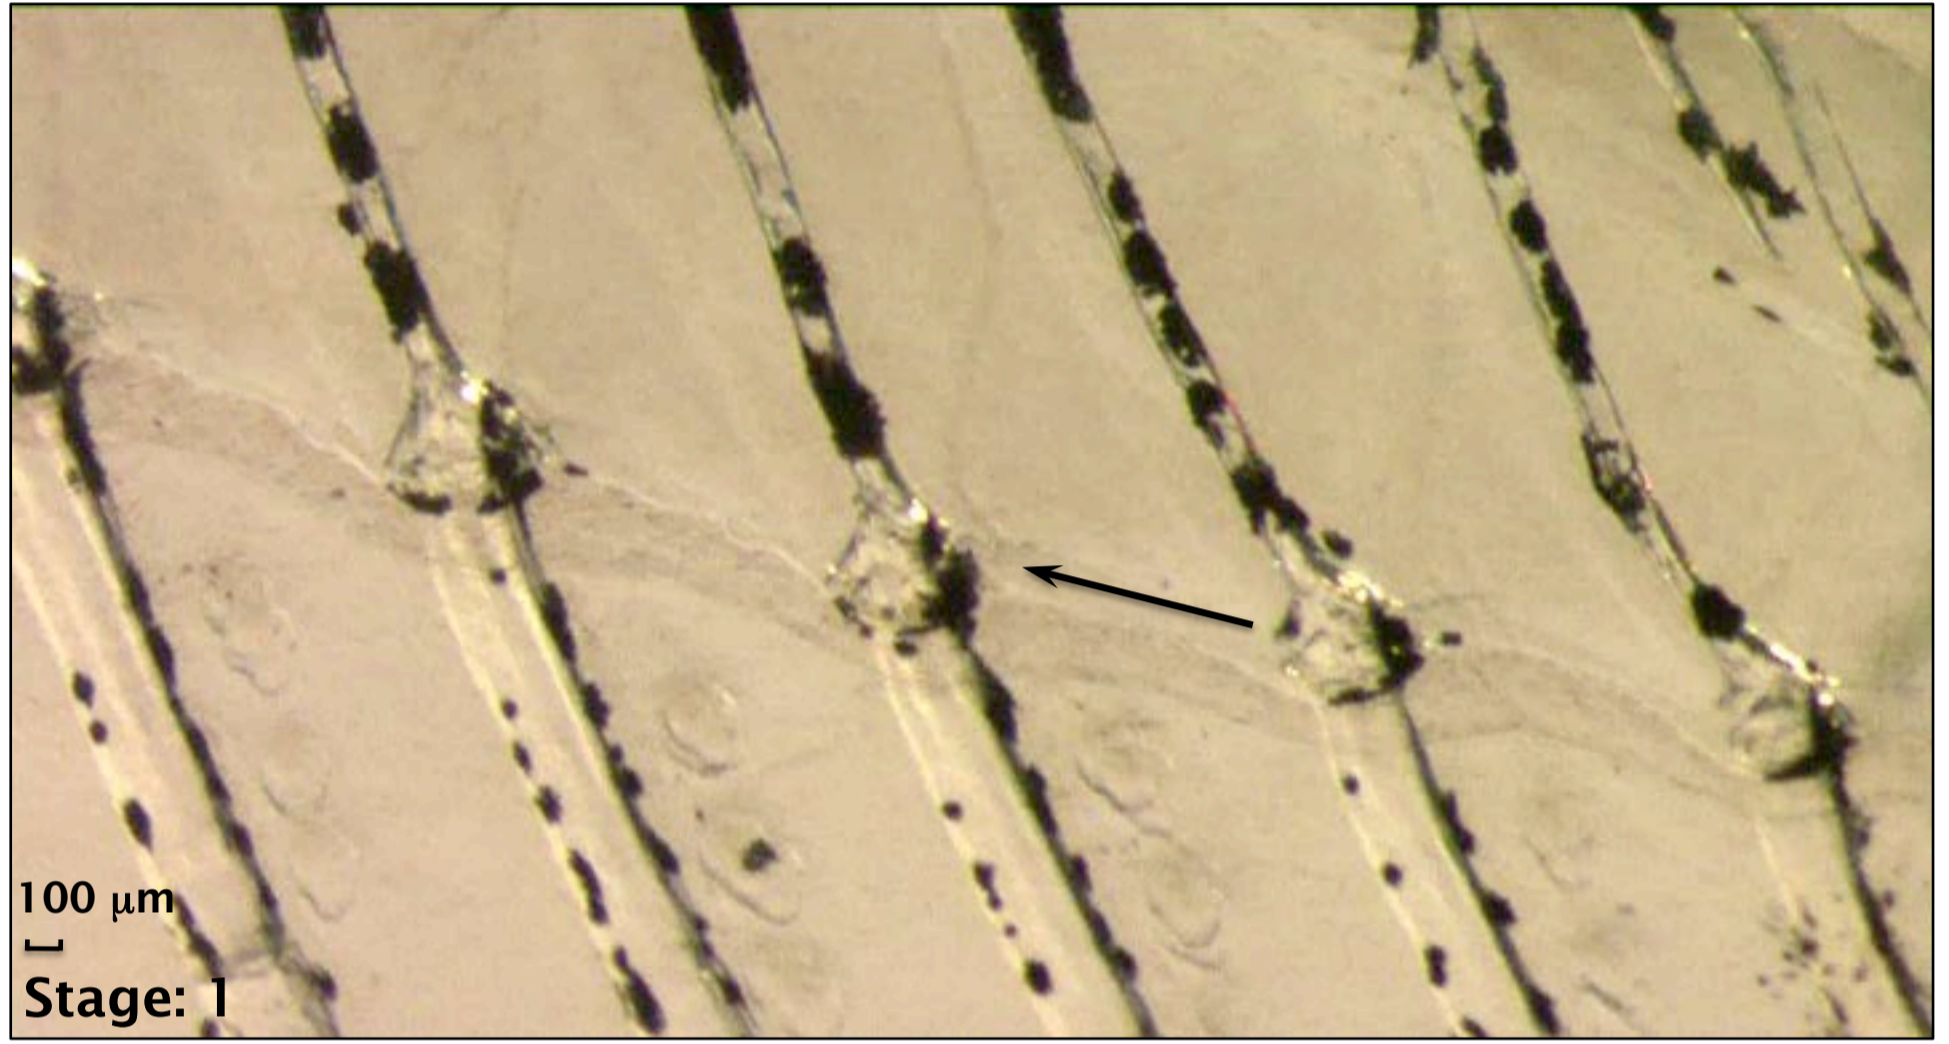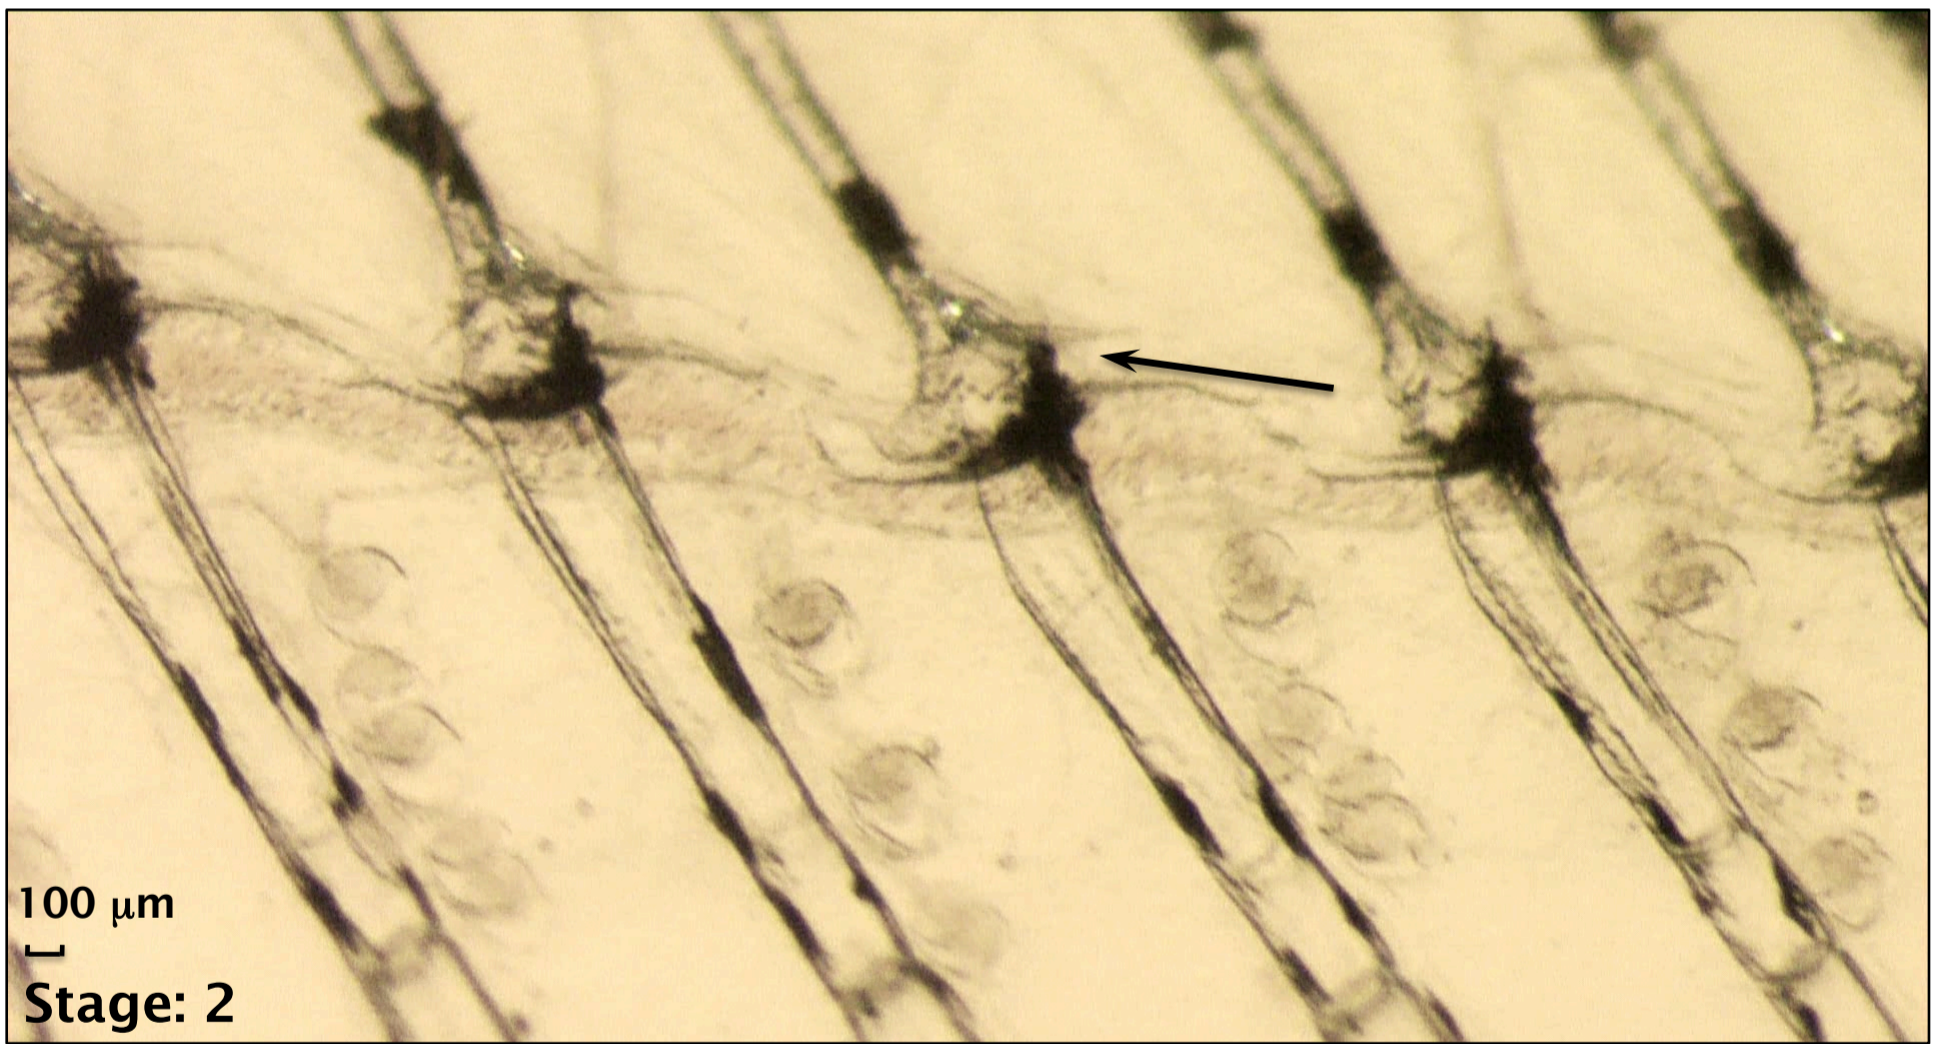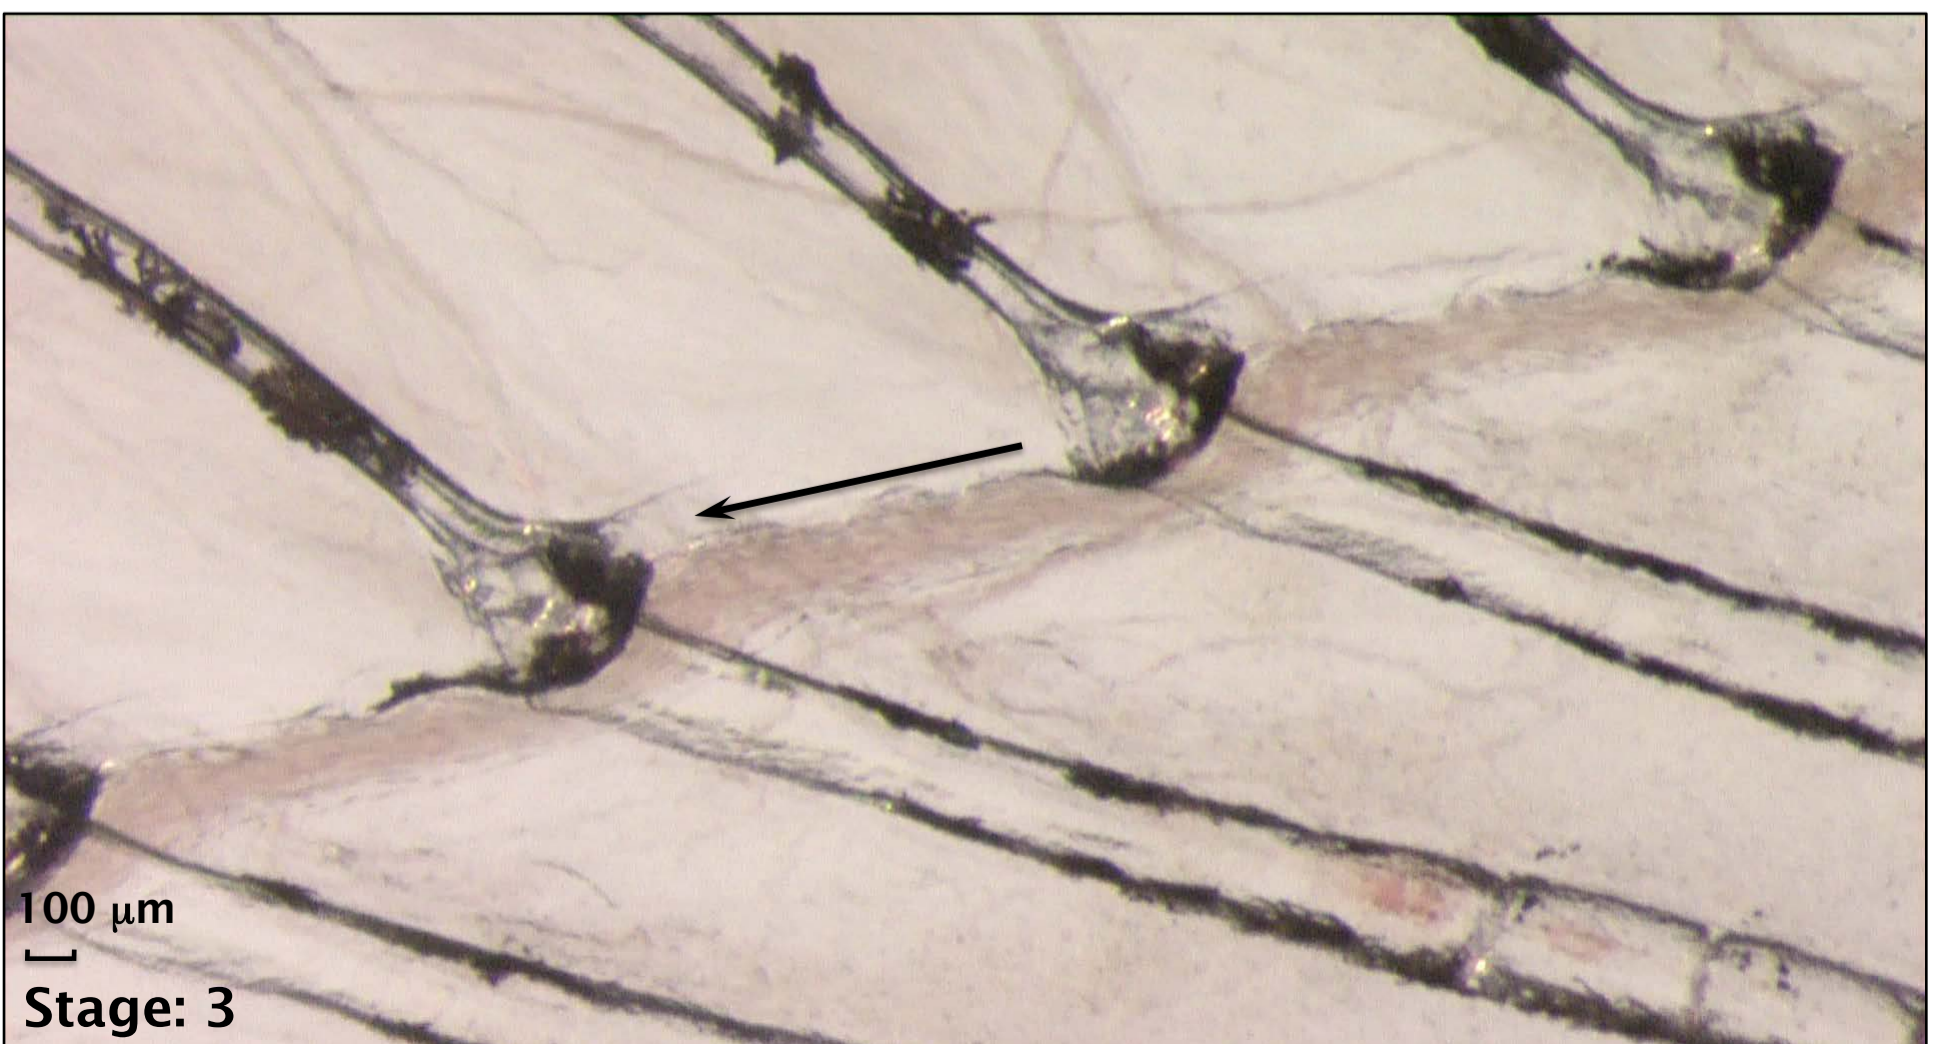

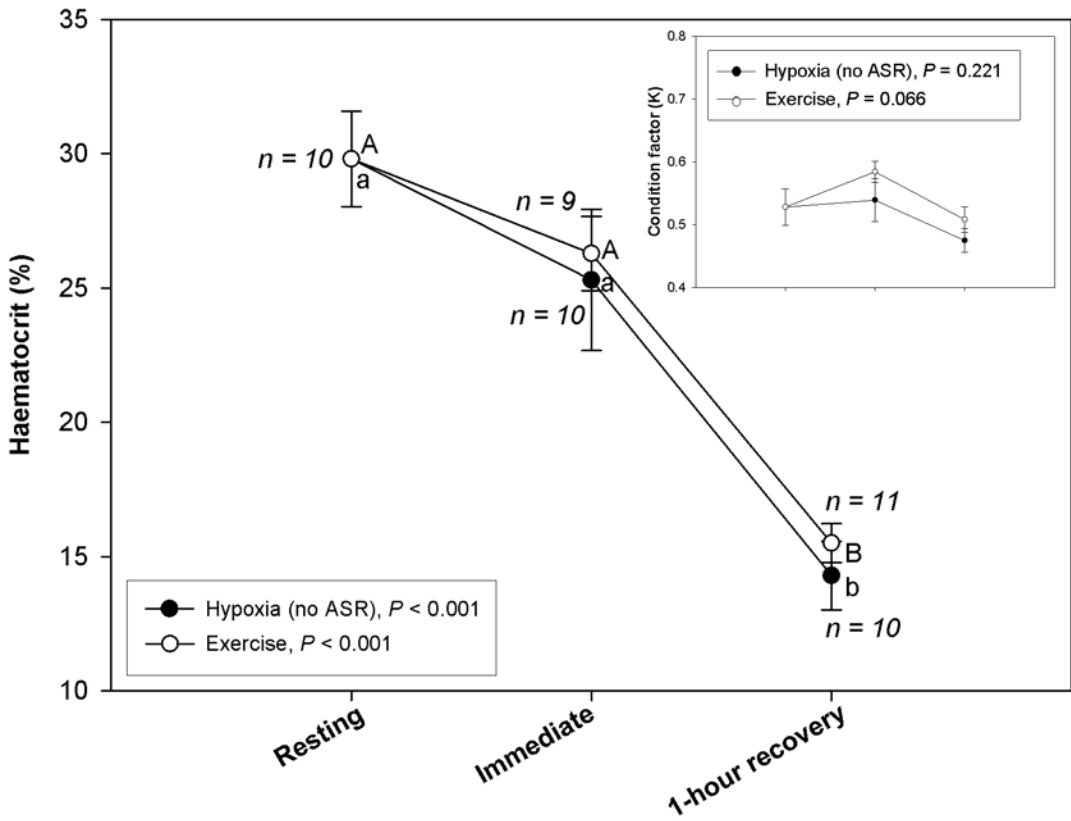

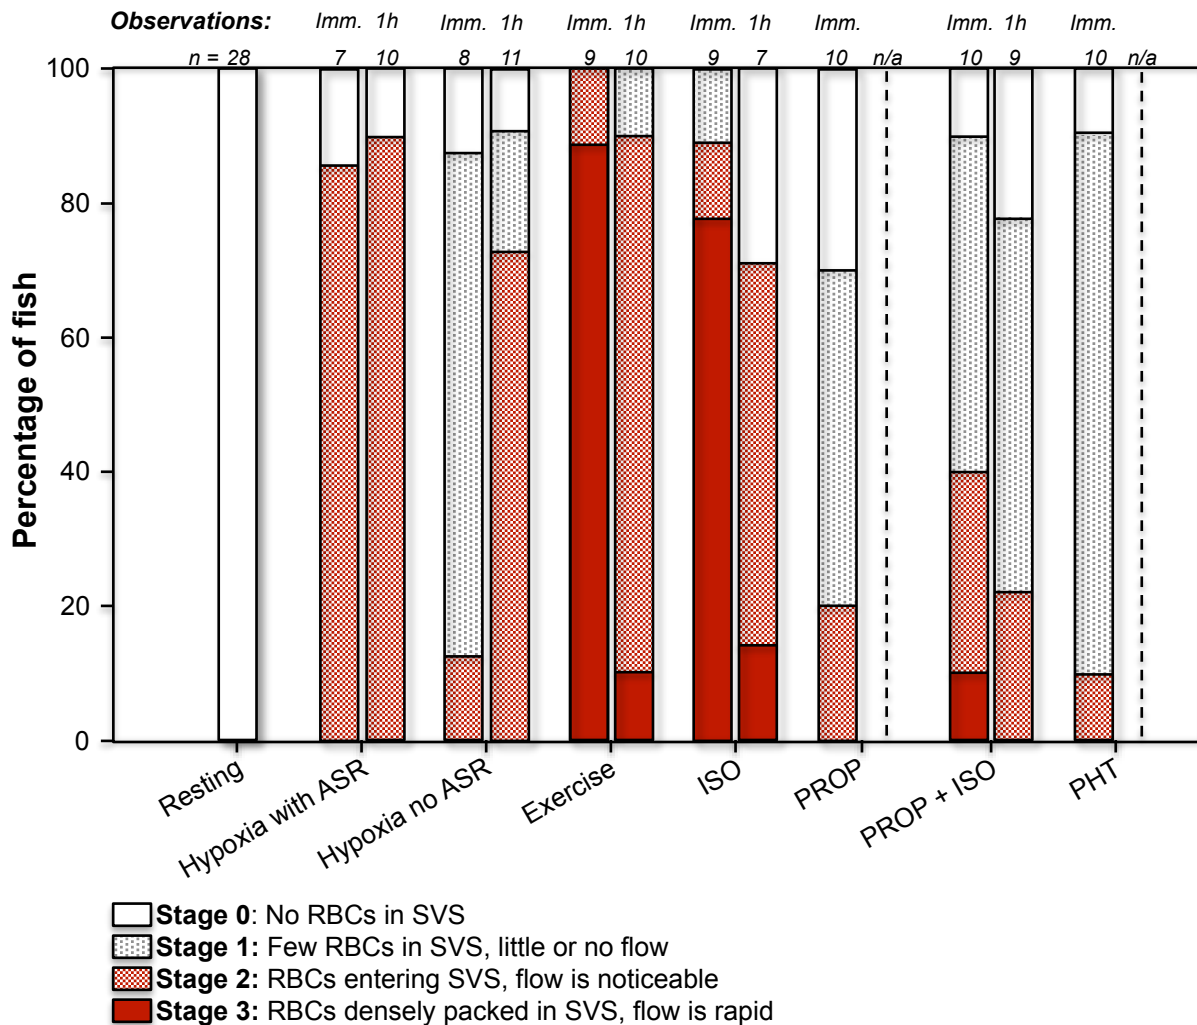

Source: https://cob.silverchair.com/jeb/article-pdf/doi/10.1242/jeb.086348/2037008/jeb_086348.pdf
